# Supplementary material for: Vitronectin as a Micromanager of Cell Response in Material‐Driven Fibronectin Nanonetworks
Source: PubMed Central journal article supplement (PMC5822048; doi:10.1002/adbi.201700047), 2017-08-10
Supplement: ADBI-1-na-s001.pdf [file ADBI-1-na-s001.pdf]

# ADVANCED BIOSYSTEMS

## Supporting Information

for *Adv. Biosys.*, DOI: 10.1002/adbi.201700047

Vitronectin as a Micromanager of Cell Response in Material-Driven Fibronectin Nanonetworks

*Marco Cantini,\* Karina Gomide, Vladimira Moulisova, Cristina González-García, and Manuel Salmerón-Sánchez\**

Copyright WILEY-VCH Verlag GmbH & Co. KGaA, 69469 Weinheim, Germany, 2016.

## Supporting Information

### Vitronectin as a Micromanager of Cell Response in Material-driven Fibronectin Nanonetworks

Marco Cantini,\* Karina Gomide, Vladimira Moulisova, Cristina González-García and Manuel Salmerón-Sánchez\*

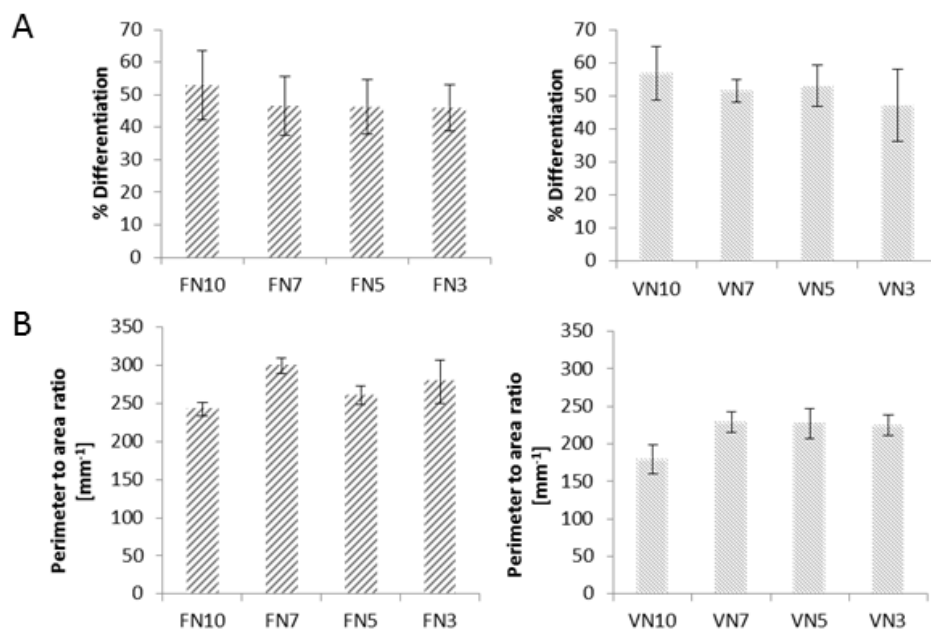

**Figure S1. Myogenic differentiation of C2C12 cells on PEA surfaces coated with different concentrations of FN or VN.** (A) Differentiation levels measured as the percentage of sarcomeric myosin-positive cells. (B) Perimeter-to-area ratio of the myotubes as an indicator of cell fusion. Protein concentrations: 10 µg/ml, 7 µg/ml, 5 µg/ml, 3 µg/ml in DPBS.
